# Supplementary material
Source: PubMed Central journal article supplement (PMC7749851)

# Suppl Fig. 1. Gene expression at P21

## A. Ileum

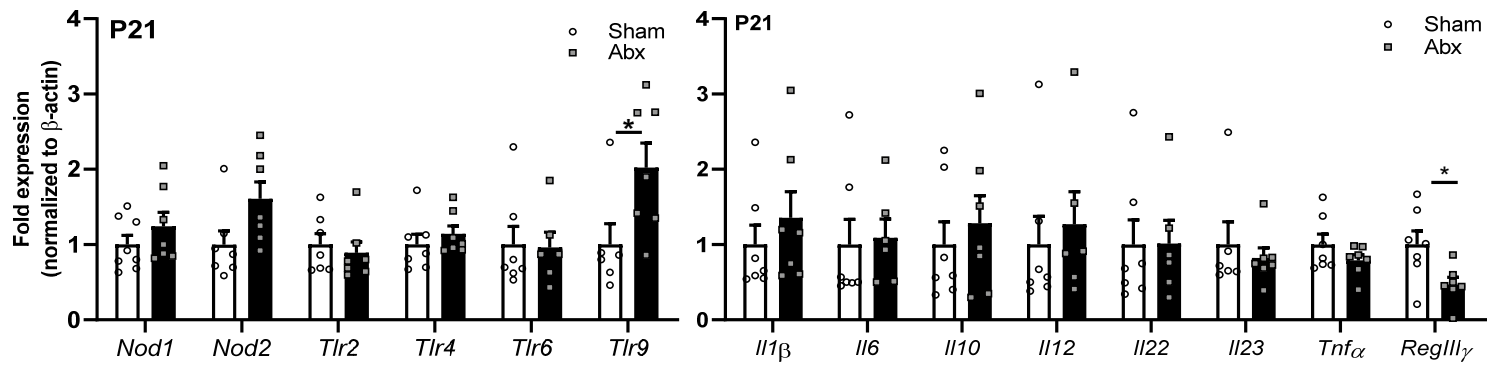

## B. PFC

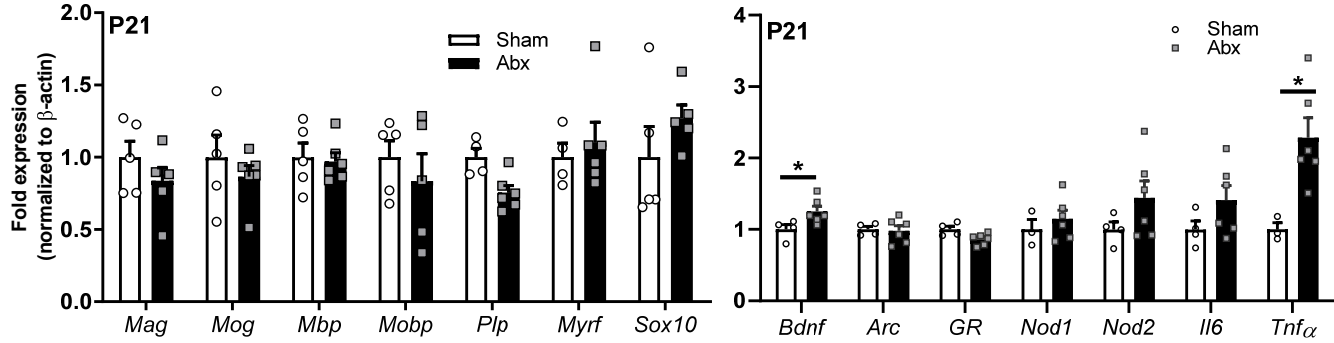

## C. Hippocampus

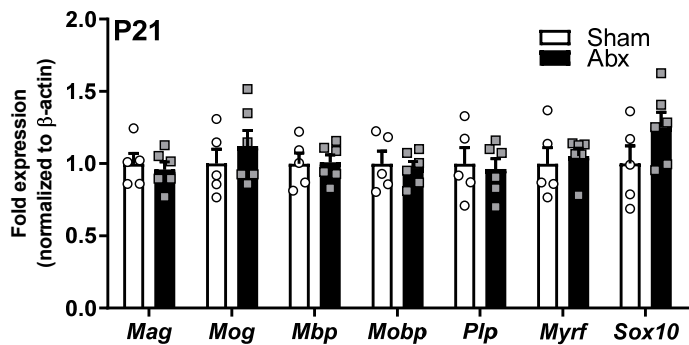

Supplement: NIHMS1647206-supplement-1.pdf [file NIHMS1647206-supplement-1.pdf]
